# Supplementary material
Source: PubMed Central journal article supplement (PMC4119488)
Supplement: NIHMS606332-supplement-304440DR2_Online_Data_Supplement.pdf [file NIHMS606332-supplement-304440DR2_Online_Data_Supplement.pdf]

## SUPPLEMENTAL MATERIAL

### Online Methods

#### **Mice**

Transgenic mice were generated at the UCLA core facility. A dominant active form of IDOL (K293R, K309R, K310R, K320R) known as super IDOL (sIDOL) was expressed in mice under the direction of the albumin enhancer/promoter. A pBluescript vector containing the albumin enhancer/promoter followed by sIDOL and bovine growth hormone polyA was generated.<sup>1</sup> The linearized construct was gel purified and microinjected into C57B/6J mice fertilised zygotes. Founders were identified using the following PCR primers (For-GCCAGGAGGGCTCTGTACA; Rev-GAATAGAATGACACCTACTCAGACAAT). At 6 weeks of age L-sIDOL mice and their wild type littermates were fed a western diet (WD; 21% fat 0.21% cholesterol; Research Diets; n=69) or maintained on a chow diet (n=46) for 20 or 30 weeks as indicated. LDLR KO mice (n=7) were purchased from Jackson Laboratories at 5 weeks of age and placed on a WD from 6 weeks of age for 20 weeks. The ApoE\*3 Leiden mice were generously provided to Jake Lusis by Louis M. Havekes in 2008.<sup>2</sup> The strain designation is E3L. Since being received at UCLA they have been crossed to the C57BL/6J background. ApoE\*3 Leiden mice (n=9) were placed on a WD from 6 weeks of age for 20 weeks. All mice were maintained on a 12-hour light/dark cycle and had access to food and water *ad libitum*. Mice were fasted for 6 hours prior to sacrifice. Animal studies were carried out in accordance with the Public Health Service (PHS) Policy on Humane Care and Use of Laboratory Animals and the UCLA Animal Research Committee guidelines.

#### **Hepatic Fat Mass**

Hepatic fat mass was assessed using a 3-in-1 magnetic resonance imager (EchoMRI). A lobe of the liver was excised from mice and placed in ice cold PBS until the time of analysis. Data was expressed as tissue fat mass as a percentage of total tissue mass (fat and lean mass).

#### **Plasma Metabolites**

Plasma cholesterol (Wako) and triglyceride (Wako) levels were measured by colourimetric assay according to the manufacturers instructions. Alanine aminotransferase (ALT) levels were measured by enzymatic assay according to the manufacturers instructions (Thermo Fisher).

#### **Lipid Profiles**

Cholesterol and triglyceride concentrations were determined by size-exclusion chromatography as previously described.<sup>3</sup> An aliquot of plasma containing 25µg of

cholesterol or triglyceride was diluted with buffer (0.9% saline with 0.01% sodium azide/EDTA) to a final volume of 0.2mL. 15µg of cholesterol or triglyceride was then loaded onto the column (Superose 6 100/300 GL; GE Healthcare). The detector response was converted to concentration (mmol/L) to allow for comparison between groups.

### ***En face* Lesion Analysis**

Mice were euthanized and perfused with 7.5% sucrose in paraformaldehyde. Aortas were subsequently excised, cleaned of adventitial fat, pinned and stained with Sudan IV. Images were taken with a CCD camera. Computer assisted image analysis of the aortic arch was performed as described previously.<sup>4</sup> Lesions were quantitated as percentage surface area covered.

### **Aortic Root Analysis**

Excised aortas were embedded in OCT (Sakura Finetech) and stored at -80°C. Aortic root sections were quantified as previously reported.<sup>5-9</sup> Briefly, serial 10 µM thick cryosections were cut from the middle portion of the left ventricle of the aortic root. Alternate sections obtained from the region spanning the appearance to the disappearance of the aortic valves were placed on poly-L-lysine coated slides (n=10 sections/mouse). Sections were stained with oil red O (Sigma) and counter-stained with haematoxylin. The mean cross-sectional lesion area was determined for each mouse as square micrometers per section in a blinded fashion. Sections were stained to assess lesion architecture with haematoxylin and eosin using standard methods. Sections were stained for collagen using the standard Masson's Trichrome method.<sup>10</sup> Immunohistochemical studies were performed as previously described.<sup>11</sup> Briefly, cryosections were mounted on poly-D-lysine coated plates, fixed using dry acetone and blocked with normal rabbit serum (Vector Laboratories). Macrophages were detected using an anti-CD68 antibody (AbD Serotec). Sections were incubated with biotinylated secondary antibody followed by avidin/biotinylated enzyme complex-alkaline phosphatase (Vector Laboratories) and vector red substrate (Vector Laboratories) then counterstained with haematoxylin. Sections were visualised using a Zeiss upright microscope equipped with an Axiocam 506 colour camera.

### **Western Blotting**

Liver tissue was solubilised in RIPA buffer (Boston Bioproducts; Tris-HCl 50mM, pH 7.4, NaCl 150mM, NP-40 1%, Sodium deoxycholate 0.5%, SDS 0.1%) supplemented with protease inhibitors (Roche Diagnostics) using a Dounce homogeniser. Lysates were clarified by centrifugation then quantified using the Bradford assay (Biorad) with BSA as a reference.

For apolipoprotein distribution, 50 $\mu$ L of plasma was brought to 0.4mL above buffer (0.9% saline with 0.01% sodium azide/EDTA) and 0.2mL injected into an HPLC column (Superose 6 100/300 GL; GE Healthcare) and fractions were collected. Samples were separated on Nupage Bis-Tris gels then transferred to polyvinylidene difluoride membranes (GE Osmonics). Membranes were probed with antibodies against LDLR (Cayman Chemical Company),  $\beta$ -actin (Sigma), apolipoprotein A-I (Meridian Life Sciences) or apolipoprotein B (Abcam). Appropriate horseradish peroxidase-conjugated secondary antibodies were used (Invitrogen, Biorad) and blots visualized with chemiluminescence (Amersham).

### **RNA isolation and quantitative PCR**

Excised aorta was cleaned of adventitial fat and stored in RNA later at -20°C until RNA extraction. An RNA isolation kit (Qiagen) was used to extract RNA. For liver, muscle and adipose samples, RNA was extracted using Trizol (Invitrogen) according to the manufacturers instructions. RNA was reverse transcribed using the iScript cDNA synthesis kit (Bio-rad). Quantitative PCR was performed using SYBR green (Diagenode) on an Applied Biosystems 7900HT sequence detector. Gene expression was normalised to *rplp0*. For primer sequences see Online Table II.

### **Statistical Analysis**

An unpaired students *t*-test with or without Welch's correction, a Mann Whitney test or analysis of variance (ANOVA) with Tukey's multiple comparison test were performed where appropriate. Statistical significance was determined as  $p < 0.05$ . Data is expressed as mean  $\pm$  standard error of the mean (SEM).

|               | Chow 20 weeks |           | WD 20 weeks |             | Chow 30 weeks |           | WD 30 weeks |             |
|---------------|---------------|-----------|-------------|-------------|---------------|-----------|-------------|-------------|
|               | WT            | L-sIDOL   | WT          | L-sIDOL     | WT            | L-sIDOL   | WT          | L-sIDOL     |
| N             | 7             | 4         | 11          | 11          | 7             | 5         | 6           | 7           |
| Body weight   | 26.5±1.1      | 23.3±0.7  | 37.6±1.0    | 36.5±2.1    | 26.4±1.6      | 28.0±1.9  | 39.1±1.5    | 36.0±1.9    |
| Liver Weight  | 1.0±0.0       | 1.0±0.0   | 1.8±0.1     | 2.1±0.3     | 1.1±0.1       | 1.0±0.1   | 2.1±1.6     | 2.2±1.7     |
| LW/BW (%)     | 3.8±0.2       | 4.1±0.1   | 5.0±0.3     | 5.5±0.4     | 4.0±0.2       | 3.5±0.1   | 4.9±0.3     | 6.2±0.4*    |
| Triglycerides | 0.46±0.05     | 0.46±0.02 | 0.29±0.02   | 0.45±0.05** | 0.56±0.08     | 0.45±0.06 | 0.13±0.03   | 0.25±0.04** |

**Online Table I. Female mouse metabolic data.** BW – body weight; LW – liver weight; TGs - triglycerides; L-sIDOL – Albumin driven super IDOL transgenic mice; WT – wild type. \* p<0.05, \*\*p<0.01 vs matched wild type.

| mRNA   | Forward primer 5' - 3'       | Reverse primer 5' - 3'   |
|--------|------------------------------|--------------------------|
| mRplp0 | AGATGCAGCAGATCCGCA           | GTTCTTGCCCATCAGCACC      |
| mABCAI | GGTTTGGAGATGGTTATACAATAGTTGT | CCCGGAAACGCAAGTCC        |
| mAIM   | TTTGTGGATCGTGTTTTTCAGA       | CTTCACAGCGGTGGGCA        |
| mICAM  | CCCACGCTACCTCTGCTC           | GATGGATACCTGAGCATCACC    |
| mIDOL  | TGTGGAGCCTCATCTCATCTT        | AGGGACTCTTTAATGTGCAAG    |
| mLDLR  | AGGCTGTGGGCTCCATAGG          | TGCGGTCCAGGGTCATCT       |
| mRelA  | CCCAGACCGCAGTATCCAT          | GCTCCAGGTCTCGCTTCTT      |
| mSra   | CTTTACCAGCAATGACAAAAGAGA     | ATTTACGGATTCTGAACTGC     |
| mSTAT6 | CCTTTGAGGAGAGCCTAGCA         | CTGCTGCAGCTGGGAATAA      |
| mVCAM  | TTCACGTGGGGCACAAAGAA         | AGCTTGAGAGACTGCAAACAGTA  |
| mVEGF  | AATGCTTTCTCCGCTCTGAA         | CTCACCAAAGCCAGCACATA     |
| hIDOL  | CGAGGACTGCCTCAACCA           | TGCAGTCCAAAATAGTCAACTTCT |

**Online Table II. Primer sequence.** m = mouse; h = human.

## REFERENCES

1. Pinkert CA, Ornitz DM, Brinster RL, Palmiter RD. An albumin enhancer located 10 kb upstream functions along with its promoter to direct efficient, liver-specific expression in transgenic mice. *Genes Dev.* 1987;1:268-276
2. van den Maagdenberg AM, Hofker MH, Krimpenfort PJ, de Bruijn I, van Vlijmen B, van der Boom H, Havekes LM, Frants RR. Transgenic mice carrying the apolipoprotein e3-leiden gene exhibit hyperlipoproteinemia. *The Journal of biological chemistry.* 1993;268:10540-10545
3. Lee RG, Kelley KL, Sawyer JK, Farese RV, Jr., Parks JS, Rudel LL. Plasma cholesteryl esters provided by lecithin:Cholesterol acyltransferase and acyl-coenzyme a:Cholesterol acyltransferase 2 have opposite atherosclerotic potential. *Circ Res.* 2004;95:998-1004
4. Tangirala RK, Rubin EM, Palinski W. Quantitation of atherosclerosis in murine models: Correlation between lesions in the aortic origin and in the entire aorta, and differences in the extent of lesions between sexes in ldl receptor-deficient and apolipoprotein e-deficient mice. *Journal of lipid research.* 1995;36:2320-2328
5. Qiao JH, Xie PZ, Fishbein MC, Kreuzer J, Drake TA, Demer LL, Lusis AJ. Pathology of atheromatous lesions in inbred and genetically engineered mice. Genetic determination of arterial calcification. *Arteriosclerosis and thrombosis : a journal of vascular biology / American Heart Association.* 1994;14:1480-1497
6. Mehrabian M, Allayee H, Wong J, Shi W, Wang XP, Shaposhnik Z, Funk CD, Lusis AJ. Identification of 5-lipoxygenase as a major gene contributing to atherosclerosis susceptibility in mice. *Circ Res.* 2002;91:120-126
7. Hong C, Bradley MN, Rong X, Wang X, Wagner A, Grijalva V, Castellani LW, Salazar J, Realegeno S, Boyadjian R, Fogelman AM, Van Lenten BJ, Reddy ST, Lusis AJ, Tangirala RK, Tontonoz P. Lxralpha is uniquely required for maximal reverse cholesterol transport and atheroprotection in apoe-deficient mice. *Journal of lipid research.* 2012;53:1126-1133
8. Bradley MN, Hong C, Chen M, Joseph SB, Wilpitz DC, Wang X, Lusis AJ, Collins A, Hseuh WA, Collins JL, Tangirala RK, Tontonoz P. Ligand activation of lxr beta reverses atherosclerosis and cellular cholesterol overload in mice lacking lxr alpha and apoe. *The Journal of clinical investigation.* 2007;117:2337-2346
9. Joseph SB, McKilligin E, Pei L, Watson MA, Collins AR, Laffitte BA, Chen M, Noh G, Goodman J, Hagger GN, Tran J, Tippin TK, Wang X, Lusis AJ, Hsueh WA, Law RE, Collins JL, Willson TM, Tontonoz P. Synthetic lxr ligand inhibits the development of atherosclerosis in mice. *Proceedings of the National Academy of Sciences of the United States of America.* 2002;99:7604-7609
10. Masson P. Some histological methods; trichrome stainings and their preliminary technique. *J. Tech. Methods.* 1929;12:75-90
11. Orozco LD, Kapturczak MH, Barajas B, Wang X, Weinstein MM, Wong J, Deshane J, Bolisetty S, Shaposhnik Z, Shih DM, Agarwal A, Lusis AJ, Araujo JA. Heme oxygenase-1 expression in macrophages plays a beneficial role in atherosclerosis. *Circ Res.* 2007;100:1703-1711
